# Supplementary material for: Remodeling of Leaf Cellular Glycerolipid Composition under Drought and Re-hydration Conditions in Grasses from the Lolium-Festuca Complex
Source: Front Plant Sci. 2016 Jul 19;7:1027. doi: 10.3389/fpls.2016.01027 (PMC4950141; doi:10.3389/fpls.2016.01027)
Supplement: Supplementary Table S4 — The relative percentage differences in accumulation levels of the analyzed lipid species and classes. Calculations were performed for four time-points of experiment: after 3, 6, and 11 days of drought (DR), and after 10 days of re-hydration (RH) in the 4/10 and 7/6 genotypes, according to the control values, based on normalized mean mass spectral peak intensities. Lipids denoted as in Supplementary Table S1. [file Table4.xls]

## Sheet: Table S4
Supplementary Table S4 The relative percentage differences in accumulation levels of the analyzed lipid species and classes.
Calculations were performed for four time-points of experiment: after three, six and 11 days of drought (DR), and after ten days of re-hydration (RH) in the 4/10 and 7/6 genotypes, according to the control values, based on normalized mean mass spectral peak intensities.
Lipid species and pools for classes	Time-point of experiment
	3 days of DR	6 days of DR	11 days of DR	10 days of RH	3 days of DR	6 days of DR	11 days of DR	10 days of RH
	Genotype 4/10				Genotype 7/6
DAG 34:2	51.56	21.5131	-18.4304	40.2335	16.0248	10.9297	-9.92113	52.1808
DAG 34:3	-16.8762	-26.9053	-48.1406	-31.0877	-4.33734	-18.0182	-47.4369	-29.6226
DAG 36:4	122.808	60.1023	26.5955	115.799	23.9178	15.3305	27.1677	134.033
DAG 36:5	36.228	13.4102	-15.9697	27.5917	1.40767	-8.26454	-17.2044	14.8131
DAG 36:6	-36.8393	-31.4081	-58.8539	-27.6619	-29.5441	-47.3874	-57.4792	-52.0701
DAG POOL	-0.89705	-11.2428	-38.6132	-2.98258	-8.65232	-21.7333	-32.7269	-5.72677
DGDG 32:0	34.9658	15.5786	45.4785	76.9716	10.1725	-0.444965	12.8244	36.8283
DGDG 34:3	43.5753	29.0855	56.5297	47.649	15.9005	24.1886	22.3662	36.0178
DGDG 34:4	114.644	80.4091	204.113	124.323	16.8192	40.2336	55.448	64.5069
DGDG 36:3	372.475	309.951	703.597	550.666	223.413	709.266	1164	1380.54
DGDG 36:5	29.1193	32.8482	22.259	11.742	20.9878	49.4902	55.4147	42.8026
DGDG 36:6	4.78332	1.58831	6.11245	-3.21577	3.40743	-0.899085	-5.50682	-0.580364
DGDG 38:5	105.228	98.9028	74.7328	55.5568	74.0409	139.137	142.273	161.881
DGDG 38:6	128.066	70.1768	146.55	94.0021	28.8444	29.6833	30.4666	52.7664
DGDG POOL	14.3642	10.2124	17.1831	7.31574	7.43357	-2.78503	5.71311	10.9827
Lyso-DGDG 18:3	77.9806	10.4311	75.6215	21.0456	8.85272	91.4426	81.6833	106.065
Lyso-MGDG 18:3	181.82	129.337	79.2661	104.395	53.0015	108.041	112.19	234.96
MGDG 34:4	134.072	106.224	223.254	102.193	31.151	28.1466	46.0204	74.6522
MGDG 34:5	0	-23.5029	-25.0786	-54.8302	14.8131	-12.5158	-37.1551	-60.46
MGDG 36:3	342.874	295.131	338.813	293.316	169.433	289.662	423.936	661.035
MGDG 36:4	77.3533	32.7123	80.6195	39.533	-6.22447	2.07137	13.3911	35.1562
MGDG 38:6	157.594	90.271	133.631	83.6809	31.3578	29.6157	29.63	74.2127
MGDG POOL	97.0057	44.1564	100.24	57.1396	4.02526	13.3246	27.3405	55.6551
PC 32:1	19.6407	19.9671	88.813	-11.9901	1.89443	-3.67509	55.556	-10.8305
PC 32:3	-43.1645	-33.8266	-28.4986	-69.1803	-10.0069	-24.7132	-35.1289	-70.1891
PC 34:0	-0.268423	1.0124	4.05654	3.70502	4.89425	0.481187	29.0057	23.1618
PC 34:4	113.939	92.6291	180.578	26.3949	9.28155	52.2644	144.391	18.7183
PC 34:5	-21.0502	44.2232	54.4098	-65.3342	-11.213	22.1718	86.8916	-65.1796
PC 34:6	-57.8876	3.40878	34.0656	-78.0874	-25.648	-3.77276	53.1599	-81.8438
PC 36:1	130.885	123.141	220.375	112.735	30.2287	80.4953	176.369	139.238
PC 36:3	108.017	56.2934	155.14	202.8	24.5442	71.7337	332.644	353.959
PC 36:5	9.64419	5.79888	-6.98685	-7.44337	-5.31879	-3.60434	16.5753	-6.77214
PC 36:6	-24.6302	-18.0154	-23.9523	-37.6161	-8.18088	-16.0905	-27.4945	-42.542
PC 38:3 (1)	386.697	254.277	309.449	326.737	106.045	159.839	281.805	408.195
PC 38:3 (2)	-3.71499	18.3452	-44.2588	-18.1587	27.7794	6.47449	-22.9942	-32.1544
PC 38:4	124.793	83.6891	90.3953	63.3297	93.0528	86.7632	135.283	186.52
PC 38:5	208.094	165.054	155.705	117.693	39.4189	68.968	106.451	89.3305
PC 38:6	47.5949	41.6785	44.9506	4.25104	26.949	47.4431	54.4176	6.74042
PC POOL	-11.5094	-8.40747	-14.9666	-25.6544	-6.32239	-9.95678	-6.8068	-25.6494
PE 34:2	49.2411	62.8756	57.1378	94.1018	5.67019	33.6838	111.228	101.509
PE 34:3	-2.42984	11.0828	-4.74713	5.1063	-2.01471	3.77938	22.0409	-1.9163
PE 36:2	-13.7901	-26.1854	-30.9421	-52.2644	-12.3144	-43.9487	-63.8706	-67.7739
PE 36:3	181.023	148.441	263.25	283.165	48.9615	174.836	502.683	500.184
PE 36:4	75.5768	90.434	86.6301	90.5977	9.2304	44.7208	108.757	95.1964
PE 36:5	38.6543	52.9145	33.2668	33.3542	4.47583	19.663	49.1034	23.1939
PE 36:6	-21.0412	7.41698	-10.4387	-13.707	0.737521	4.36652	10.0207	-17.6872
PE 38:1	21.9451	0.0076239	22.8677	0.117808	20.4512	3.4388	19.4889	24.7043
PE 38:2	17.7002	-0.567875	-12.6154	-15.0179	-3.55104	-18.4591	-27.6608	-25.7892
PE 38:3	-27.0808	-30.0928	-45.0238	-53.765	-8.41492	-27.6872	-48.9853	-60.981
PE POOL	19.2876	32.5556	19.6673	23.4604	1.61065	11.5422	40.1509	22.7009
PG 32:0	134.387	106.503	66.0813	42.5446	67.9843	241.292	328.022	181.56
PG 32:1 (1)	29.0017	11.6133	51.8934	-10.0473	56.9829	130.503	206.497	160.958
PG 32:1 (2)	182.126	106.964	111.361	3.41913	0	153.472	146.695	22.9831
PG 34:0	341.133	280.931	106.575	-6.22675	175.087	481.781	282.586	60.6889
PG 34:1 (1)	262.42	129.391	78.898	43.3558	222.988	340.889	273.369	256.268
PG 34:1 (2)	18.0141	6.02794	78.3293	57.5725	43.3737	133.113	309.525	338.054
PG 34:2 (1)	69.2515	6.18942	-45.0865	-63.8147	0.271023	-10.187	-45.1037	-41.8162
PG 34:2 (2)	420.624	136.149	238.999	225.207	385.865	495.867	695.633	924.241
PG 34:3 (1)	118.362	107.21	87.539	69.3309	49.3848	126.984	107.88	87.2388
PG 34:3 (2)	97.0395	124.919	203.547	159.206	108.517	202.269	288.359	315.554
PG 34:4	0.584654	-0.920396	23.4294	13.8936	18.9925	23.7556	32.714	49.0441
PG 34:5	-34.0156	-49.7891	4.96492	-5.02508	14.9247	-4.77763	-18.679	52.2842
PG 36:2	430.51	407.639	430.075	299.858	116.475	290.301	673.199	512.939
PG 36:3	111.98	86.04	103.506	14.5415	42.5494	114.276	140.569	60.3354
PG 36:4	215.251	159.87	184.997	245.597	21.6034	105.392	206.351	282.726
PG 36:5 (1)	82.5444	86.7229	21.3233	44.6312	17.5552	23.8245	-13.443	38.2149
PG 36:5 (2)	35.5844	16.18	4.12963	22.2154	-3.70045	26.2874	41.7318	74.4428
PG 36:6	31.3196	4.10669	-26.6	-25.7363	-7.53372	13.714	-27.2394	-7.8823
PG 36:7	-38.234	-55.911	-39.4857	-50.034	-19.5733	-34.7422	-48.347	-13.0745
PG POOL	35.7008	20.1439	22.8871	9.85832	11.2042	41.6105	40.0516	47.5319
PI 36:6	21.0804	26.0208	13.0326	12.2256	46.8589	85.4272	99.5048	48.679
PS 38:0	69.9784	58.9576	111.764	95.5515	26.3033	70.2172	122.286	125.782
PS 38:1	45.5125	44.0121	41.5644	43.9705	5.69981	17.1006	20.8801	21.7141
PS 38:2	-8.52017	-2.25882	-7.28678	-12.1422	-0.713743	-0.549125	-17.3257	-20.5458
PS 38:5	-71.4046	7.79352	58.8617	-100	-35.9971	21.1327	64.7887	-100
PS 40:0	158.965	147.499	254.26	157.171	45.2051	127.528	235.011	184.574
PS 40:1	131.429	127.046	167.37	116.916	12.4915	48.7698	78.8135	53.2413
PS 40:3	85.5451	55.3875	44.5443	56.2538	10.1476	29.3183	55.8042	56.0797
PS 40:5	-21.0849	-0.748949	-18.5097	-38.4182	0.570319	-5.58043	-30.6361	-52.2
PS 42:2 (1)	56.4368	65.5651	-45.5208	-4.58201	62.5879	84.8599	-100	-100
PS 42:2 (2)	465.18	303.272	385.213	414.21	161.762	297.798	435.108	650.331
PS 42:3	155.948	118.667	121.916	101.896	116.101	175.128	209.424	280.054
PS 42:4	281.904	236.432	228.997	180.697	47.4274	110.3	123.875	109.057
PS POOL	6.41644	12.2972	7.06287	-0.929886	3.35763	8.83448	2.07059	-4.08576
SQDG 34:0	152.034	184.161	278.726	395.618	94.2365	100.561	114.784	190.007
SQDG 34:1	460.234	288.332	412.324	395.977	173.448	205.708	234.67	330.202
SQDG 34:2	84.4982	86.7846	139.302	137.216	32.0025	73.5109	93.7597	115.177
SQDG 34:3	13.2382	13.721	26.2238	7.94474	7.3385	8.67951	-3.30932	1.92455
SQDG 34:4	36.7739	28.4418	101.544	30.0697	21.3764	38.7403	51.0648	54.1418
SQDG 36:3	-25.5864	-66.7876	-82.5185	-84.4734	-43.8126	-78.1722	-85.9936	-82.6341
SQDG 36:5	71.3866	50.0437	83.5122	48.3497	20.1253	55.1555	52.5867	60.9933
SQDG 36:6	13.1271	9.83316	33.1106	7.79915	23.9882	29.5059	18.6699	21.0669
SQDG POOL	18.4088	13.8089	33.6888	11.3421	16.2861	22.0543	12.361	17.2013
TAG 48:1	-5.16347	11.3645	-32.3807	10.1431	-20.3791	-7.54976	-5.89201	-0.94747
TAG 48:2	-10.0144	20.0433	-53.7339	48.5035	-29.8652	-31.799	-28.5849	-17.2105
TAG 50:1	21.2978	9.92524	-50.6218	86.0174	-16.5355	-25.4154	-33.1975	10.6038
TAG 50:2	134.582	76.2326	-17.717	555.686	-35.4755	-54.4992	-57.6181	44.7673
TAG 50:3	45.7489	6.54606	-49.9412	312.847	-36.3712	-59.0144	-70.018	-2.85975
TAG 50:4	81.5169	64.7504	44.1853	436.162	-13.156	-5.47798	57.7548	53.6445
TAG 50:5	99.9187	105.379	101.151	318.058	-23.1305	-24.8047	9.99742	-20.7444
TAG 50:6	2.42316	23.7148	30.9729	126.982	-36.4969	-43.8237	-43.0369	-63.0354
TAG 52:0	-16.3624	-31.9086	-67.9574	-76.2086	-6.33702	-5.84492	-38.1387	-66.4551
TAG 52:1	38.7129	23.2017	-37.2608	14.0669	-13.3035	-23.669	-19.8842	6.03211
TAG 52:2	104.947	84.429	-12.3349	256.642	-25.3424	-32.2186	-24.0036	55.1123
TAG 52:3	103.788	88.6765	11.3418	680.09	-3.1636	12.1549	116.675	246.851
TAG 52:4	245.653	192.525	82.4794	956.65	0.559974	13.1187	86.2314	129.711
TAG 52:5	137.227	109.786	47.1738	480.704	-10.908	-13.3853	23.9531	44.5628
TAG 52:6	30.291	31.3737	0.802988	243.743	-24.9223	-32.1774	-18.9243	-18.6974
TAG 52:7	89.459	110.196	189.471	252.578	-2.1026	43.3584	199.788	18.2099
TAG 54:0	-19.0821	-22.014	-56.1711	-72.269	-7.78391	-2.12077	-18.5178	-63.6671
TAG 54:1	96.2166	22.4544	-43.887	-13.1681	27.674	-22.9213	-34.7023	-16.6978
TAG 54:3	349.292	309.357	205.149	244.924	42.0117	37.917	71.5915	103.367
TAG 54:4	307.645	254.67	119.583	920.714	9.248	45.564	159.284	312.421
TAG 54:5	216.156	189.574	128.49	973.324	10.4189	42.8536	185.332	310.01
TAG 54:6	258.995	258.918	254.219	1047.78	9.92403	59.6665	202.949	258.578
TAG 54:7	219.183	232.655	225.926	618.802	12.4598	35.4525	116.791	119.951
TAG 54:8	92.5329	124.686	107.618	247.976	-8.54418	-1.59204	32.9981	18.0133
TAG 54:9	11.1701	51.352	27.9978	88.2511	-31.8967	-28.352	-20.5614	-40.9329
TAG 56:3	250.077	165.364	-8.72101	850.123	-25.8318	-32.908	122.321	96.8902
TAG 56:4	149.512	86.4103	-13.777	727.963	-25.6412	-19.8115	112.058	170.662
TAG 56:5	307.429	472.957	93.4788	1204.38	4.87575	17.4163	181.296	259.312
TAG 56:6 (1)	193.003	208.039	115.521	710.42	40.0653	73.1479	254.149	344.037
TAG 56:6 (2)	217.486	241.924	320.784	1000.91	8.12757	90.724	226.923	250.976
TAG 56:7 (1)	480.476	448.368	350.456	1353.79	32.6132	68.2577	192.767	233.216
TAG 56:7 (2)	134.291	149.614	172.742	381.032	8.1061	41.5799	85.7969	86.2249
TAG 56:8 (1)	403.088	398.375	328.717	1080.93	14.7541	47.228	132.713	114.302
TAG 56:8 (2)	42.4776	80.4084	73.9885	137.426	-4.17675	14.8492	31.6699	22.8795
TAG 56:9 (1)	28.9336	30.5333	19.7169	194.666	-11.5771	8.39276	54.6297	25.903
TAG 56:9 (2)	-6.01895	23.4588	21.6849	54.6477	-25.6706	-8.44314	-3.33723	-27.7357
TAG POOL	89.4168	110.297	74.8777	318.359	-8.34308	2.77132	52.4301	64.8087
